# Supplementary material for: Sensitive and selective determination of trace amounts of mercury ions using a dimercaprol functionalized graphene quantum dot modified glassy carbon electrode
Source: Royal Society of Chemistry journal article supplement (doi:10.1039/d1nr00076d), 2021-01-01

**Sensitive and selective determination of trace amounts of mercury ions using dimercaprol  
functionalized graphene quantum dot modified glassy carbon electrode**

M. Esmaili<sup>a</sup>, F. Ahour<sup>a\*</sup>, S. Keshipour<sup>a</sup>

<sup>a</sup> Nanotechnology Research Center, Faculty of Science, Urmia University, Urmia, Iran.

Corresponding author:

\* Fatemeh Ahour

E-mail: [Fatemeh.ahour@gmail.com](mailto:Fatemeh.ahour@gmail.com), [f.ahour@urmia.ac.ir](mailto:f.ahour@urmia.ac.ir); Fax: +98 44-32752746

Fig. 1S. Cyclic voltammograms of the GQD-DMC modified electrode after dipping in PBS containing  $0.5 \mu\text{M}$  Hg(II) for 300 s applying  $-0.6 \text{ V}$  and then scanning the potential with various scan rates of 10, 20, 40, 100 and  $200 \text{ mV s}^{-1}$  (from inner to outer profiles), respectively; Inset: plot of  $I_p$  versus  $\nu$ .

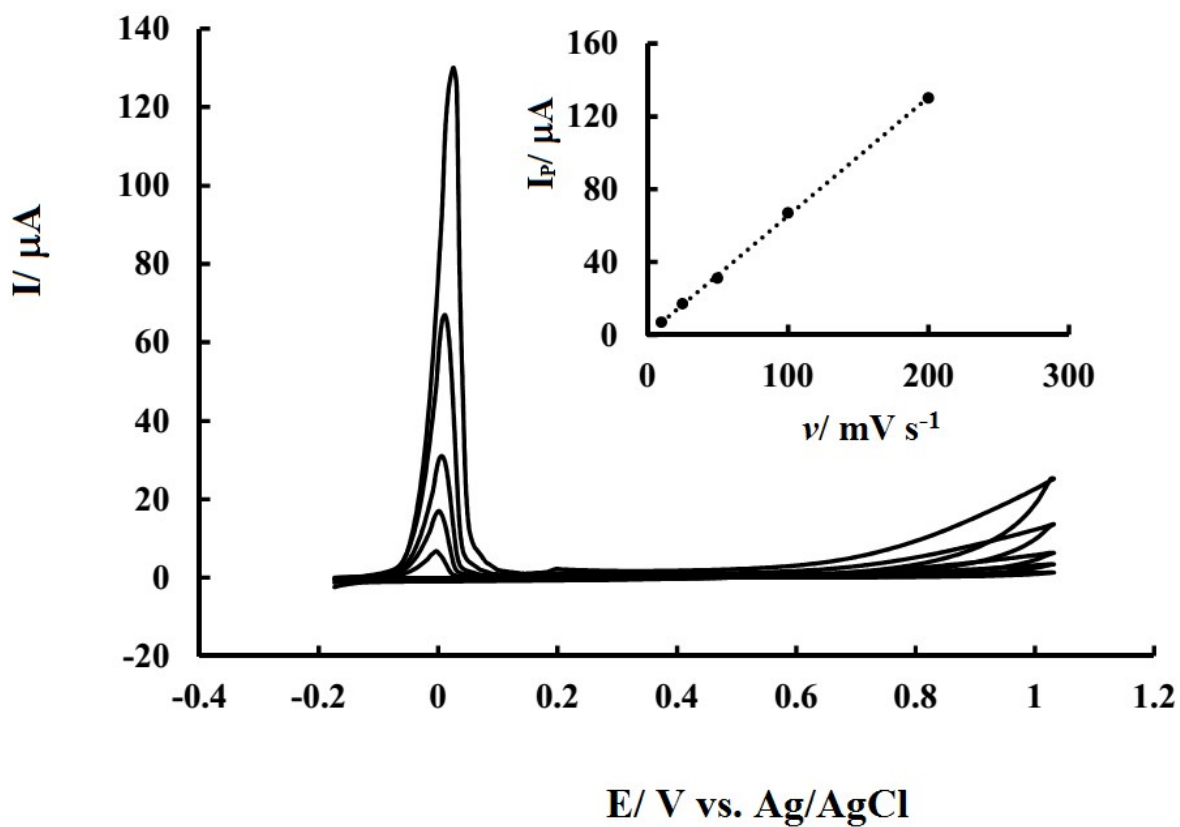

Fig. 2S. Tafel plot (variation of  $\log I$  versus  $\eta$ ) for oxidation of adsorbed Hg obtained from CV studies.

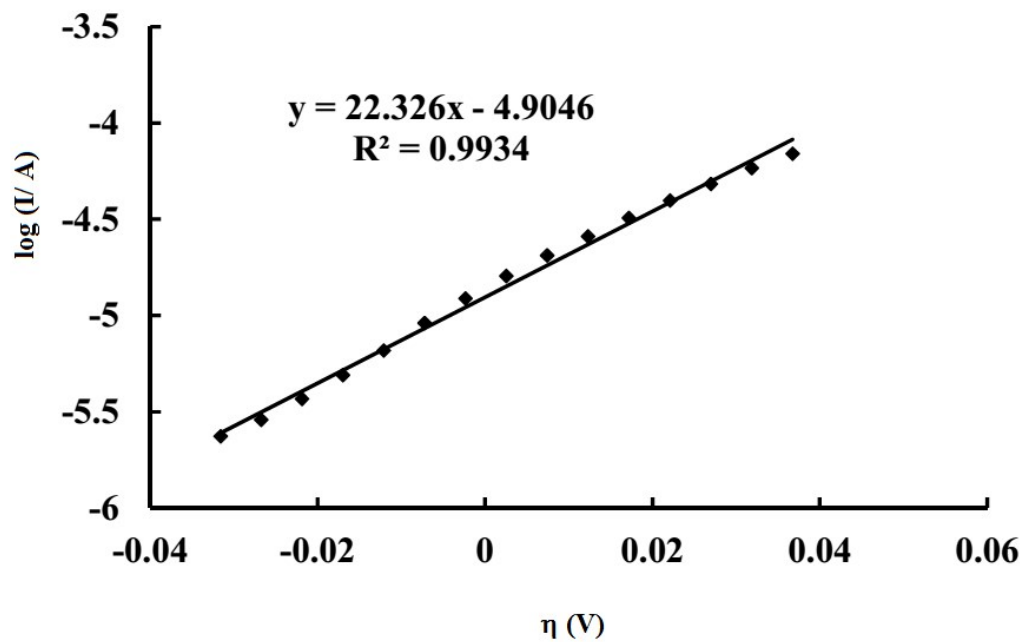

**Fig. 3S.** The effect of three inert supporting electrolytes (a) 0.1 M acetate buffer containing 0.5 M  $\text{KNO}_3$ , (b) 0.1 M phosphate buffer containing 0.5 M  $\text{KNO}_3$ , (c) 0.1 M Tris-HCl buffer and (d) 0.1 M phosphate buffer containing 0.05 M KCl as pre-concentration solution matrix on the DPV peak current of 0.5 nM mercury cations.

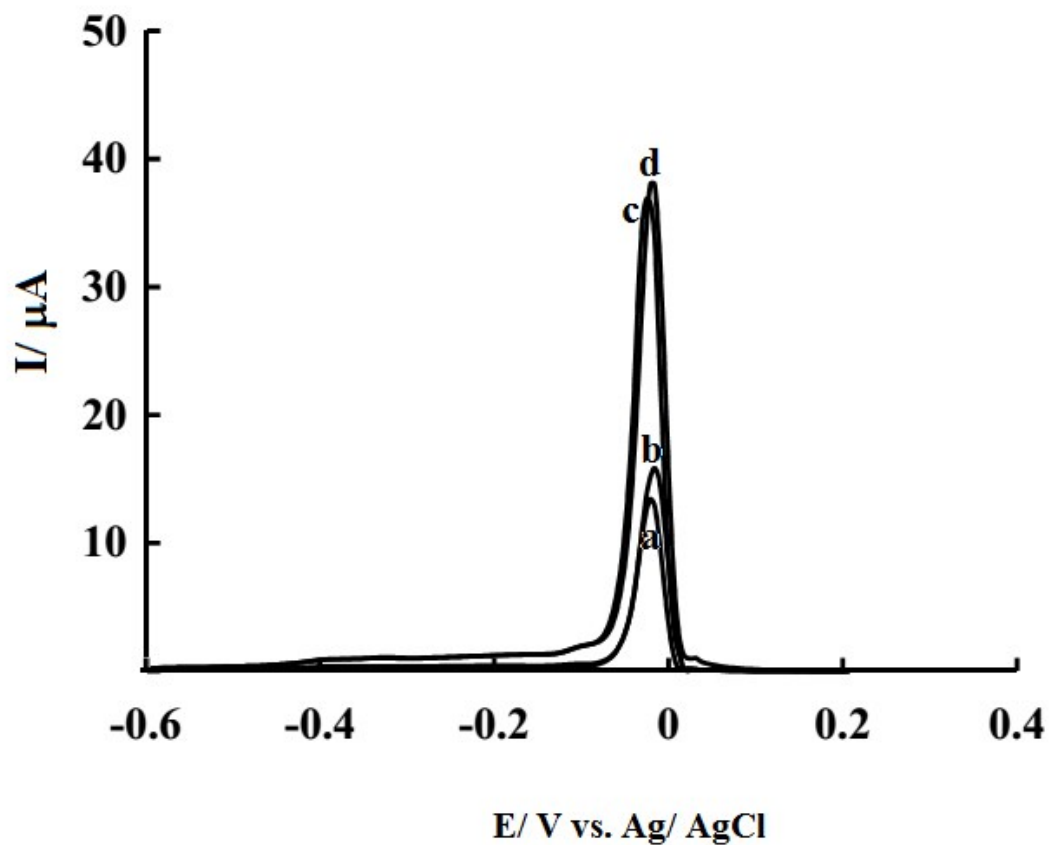

**Fig. 4S.** The effect of different concentrations of potassium chloride of the pre-concentration solution on the voltammetric peak current of 0.5 nM mercury ions.

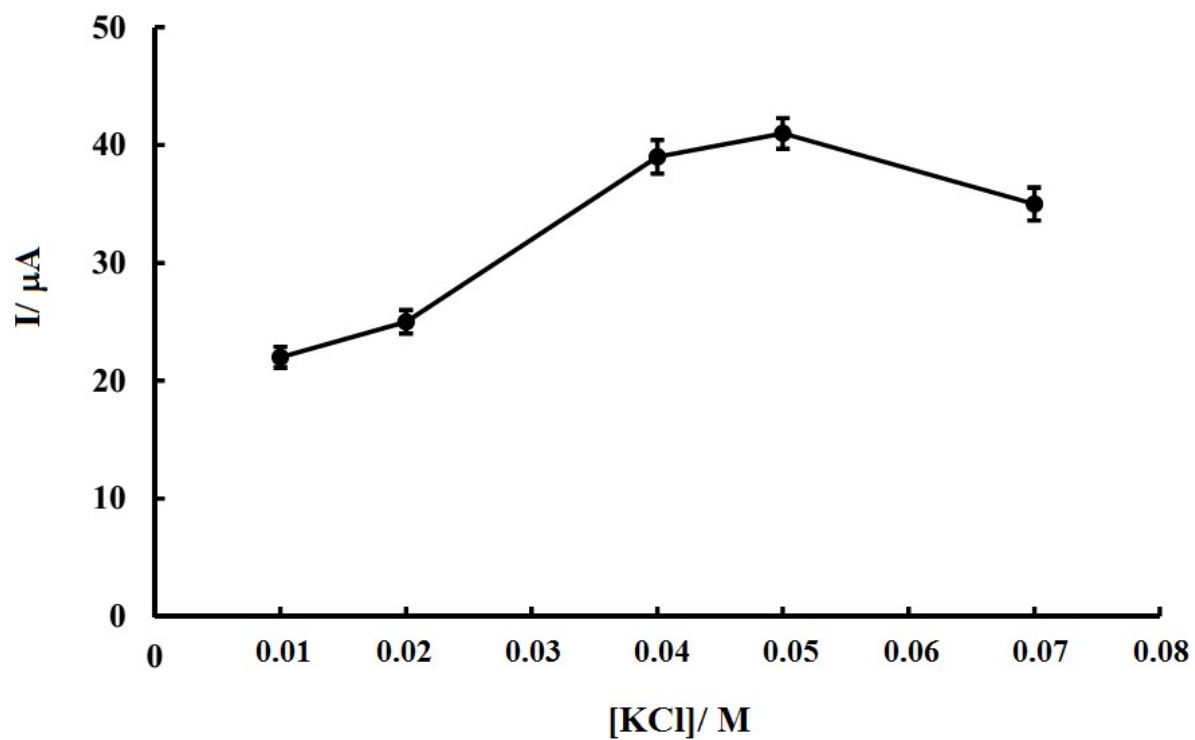

**Fig. 5S.** Differential pulse voltammetric signal of GQD-DMC modified GCE recorded after dipping in 0.5 nM mercury(II) with for various times of: 5, 60, 120, 180, 240 s under OCP condition; inset: Variation of DPV signal versus accumulation time. Determination condition: Hg(II) free PBS after reductive pre-treatment applying -0.6 V for 120 s.

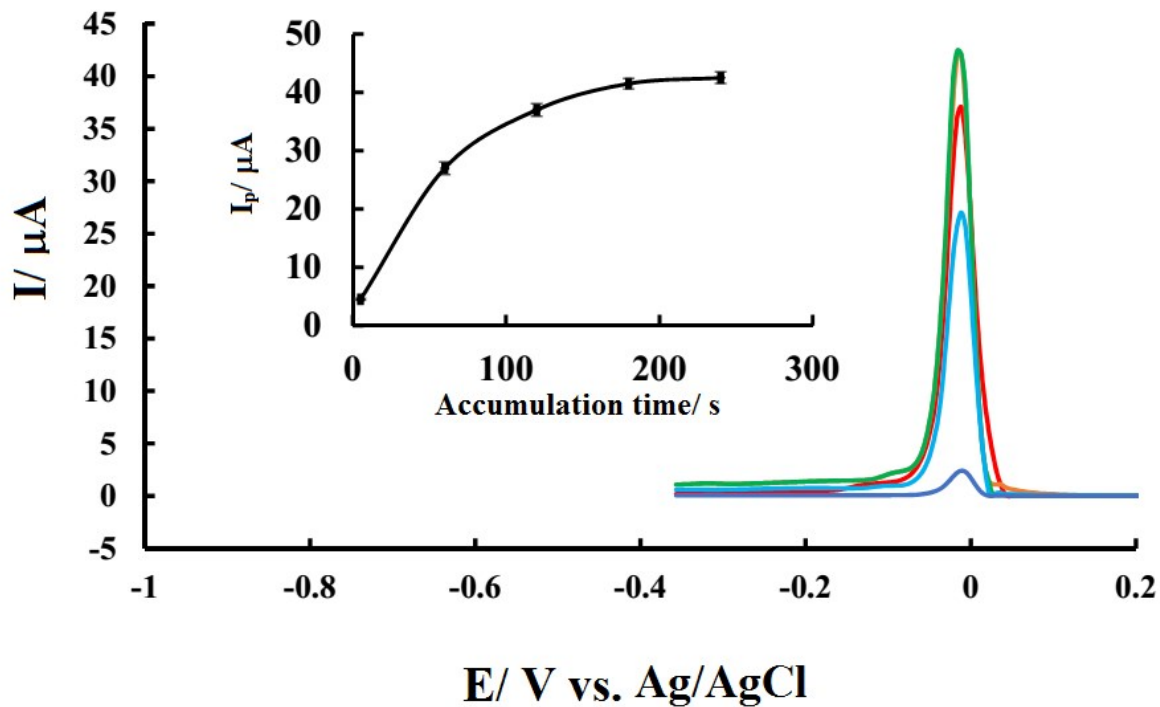

**Fig. 6S.** Histogram shows variation of DPV signal of GQD-DMC/GCE after immersion in 0.1 nM of Hg(II) ions or a mixture of 0.1 nM Hg(II) ions and other ions as presented in figure. Accumulation conditions: Chloride containing PBS (pH 6) in OCP condition for 180 s, with determination at mercury-free PBS after reduction applying -0.6 V for 120 s.

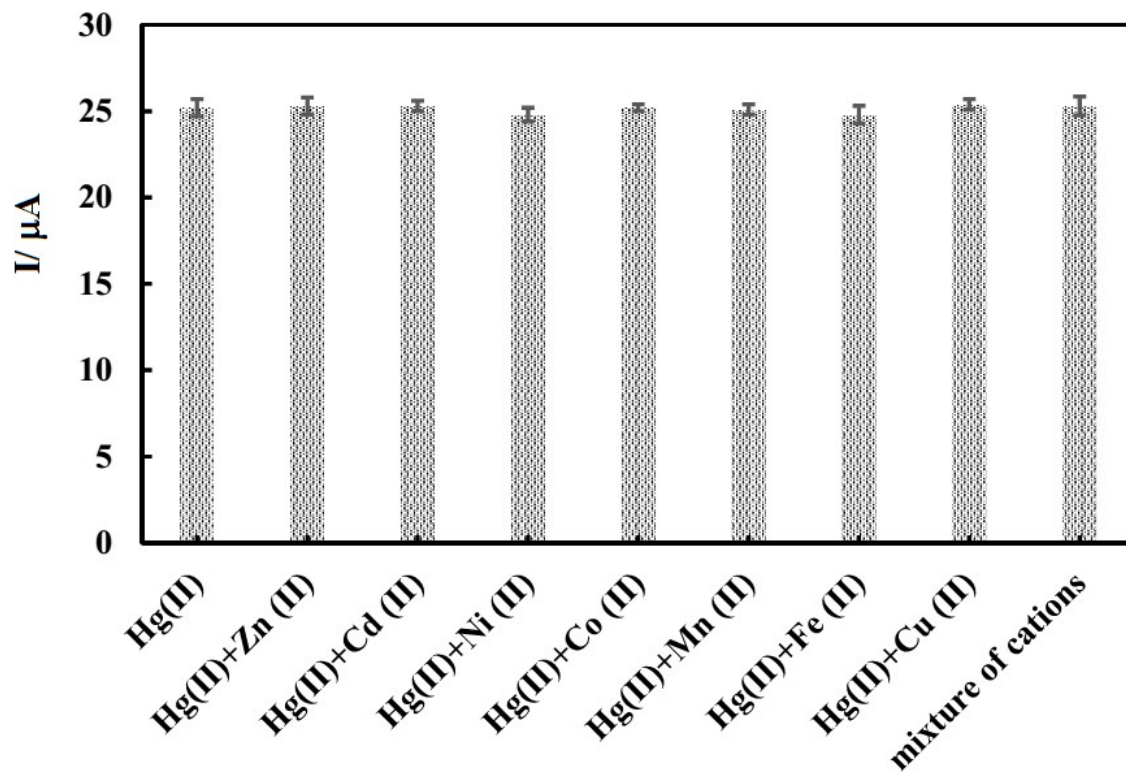

**Fig. 7S.** Differential pulse voltammograms obtained for 0.5 nM Hg(II) using five independently prepared electrodes; Accumulation conditions: Chloride containing PBS (pH 6) in OCP condition for 180 s, with determination at mercury-free PBS after reduction applying -0.6 V for 120 s.

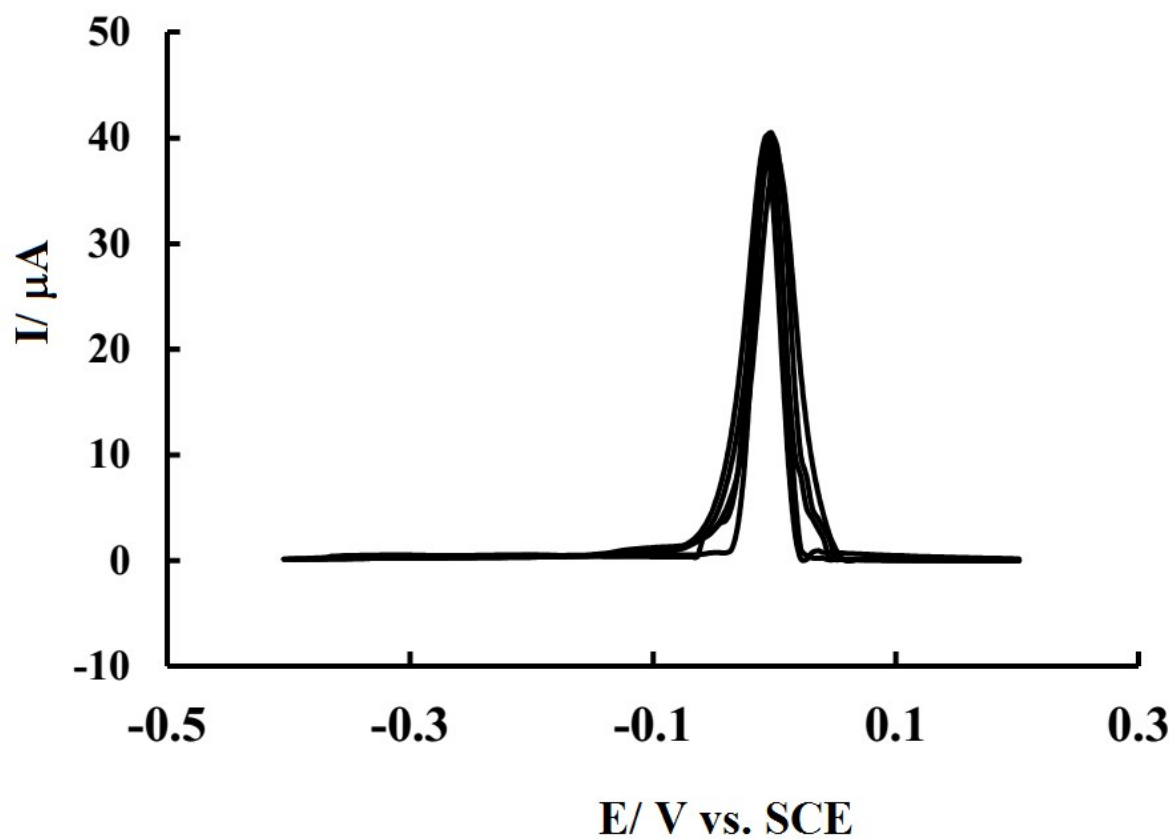



**Fig. 8S.** Differential pulse voltammograms obtained for 0.5 nM Hg(II) using newly prepared electrode and after storage for 8 days; Accumulation conditions: Chloride containing PBS (pH 6) in OCP condition for 180 s, with determination at mercury-free PBS after reduction applying -0.6 V for 120 s.

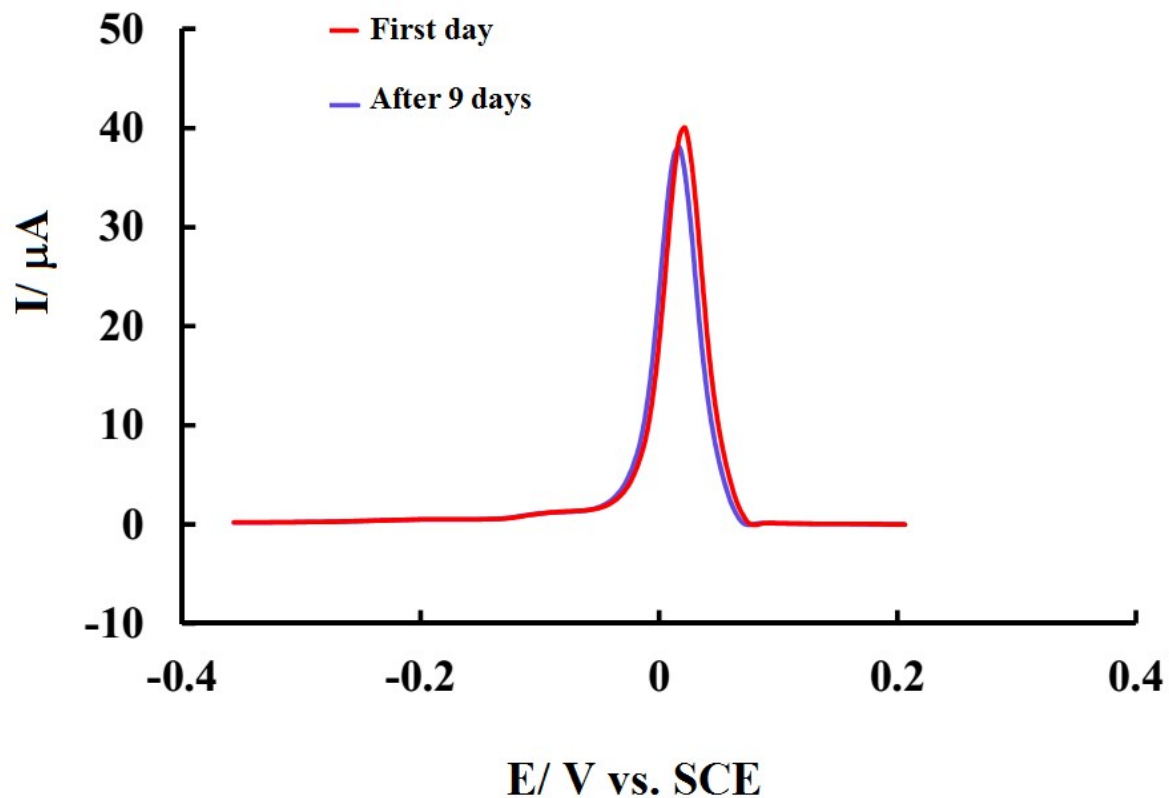

**Fig. 9S.** Differential pulse voltammograms obtained for 1:100 diluted river water (a) before and after addition of (b) 100, (c) 400, (d) 900 and (e) 5000 pM of Hg(II) standard solution.

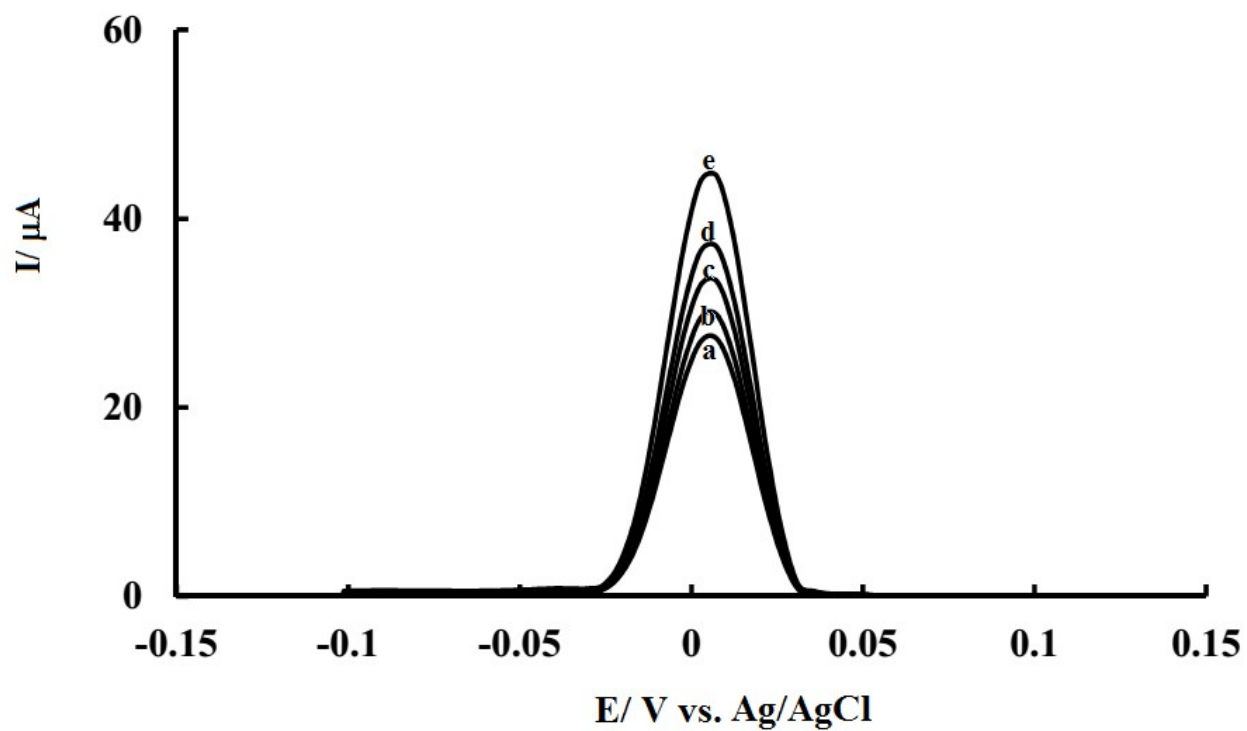

Supplement: d1nr00076d1.pdf [file d1nr00076d1.pdf]
